# Supplementary material for: Coated Blade Spray-Mass Spectrometry as a New Approach for the Rapid Characterization of Brain Tumors
Source: MDPI journal article supplement (doi:10.3390/molecules27072251), 2022-03-30
Supplement: s1 [file s1]

# Coated Blade Spray-Mass Spectrometry as a New Approach for the Rapid Characterization of Brain Tumors

Joanna Bogusiewicz<sup>1,†</sup>, Magdalena Gaca-Tabaszewska<sup>1,†</sup>, Dominik Olszówka<sup>1</sup>, Karol Jaroń<sup>1</sup>, Jacek Furtak<sup>2</sup>, Marek Harat<sup>2,3</sup>, Janusz Pawliszyn<sup>4</sup> and Barbara Bojko<sup>1\*</sup>

<sup>1</sup> Department of Pharmacodynamics and Molecular Pharmacology, Faculty of Pharmacy, Collegium Medicum in Bydgoszcz, Nicolaus Copernicus University in Torun, 85-089 Bydgoszcz, Poland, [j.bogusiewicz@cm.umk.pl](mailto:j.bogusiewicz@cm.umk.pl) (J.B.); [magda.gaca5@gmail.com](mailto:magda.gaca5@gmail.com) (M.G.T.); [dominikolszowka95@gmail.com](mailto:dominikolszowka95@gmail.com) (D.O.); [karol.jaron@cm.umk.pl](mailto:karol.jaron@cm.umk.pl) (K.J.); [bbojko@cm.umk.pl](mailto:bbojko@cm.umk.pl) (B.B)

<sup>2</sup> Department of Neurosurgery, 10th Military Research Hospital and Polyclinic, 85-681 Bydgoszcz, Poland; [jacek.furtak2019@gmail.com](mailto:jacek.furtak2019@gmail.com) (J.F.); [harat@10wsk.mil.pl](mailto:harat@10wsk.mil.pl) (M.H.)

<sup>3</sup> Department of Neurosurgery and Neurology, Faculty of Health Sciences, Collegium Medicum in Bydgoszcz, Nicolaus Copernicus University in Torun, 85-168 Bydgoszcz, Poland

<sup>4</sup> Department of Chemistry, University of Waterloo, Waterloo, ON M1B 6G3, Canada; [janusz@uwaterloo.ca](mailto:janusz@uwaterloo.ca) (J.P.)

\* Correspondence: [bbojko@cm.umk.pl](mailto:bbojko@cm.umk.pl); Tel.: +48-525-853-564

† These authors contributed equally

## SUPPLEMENTARY MATERIALS

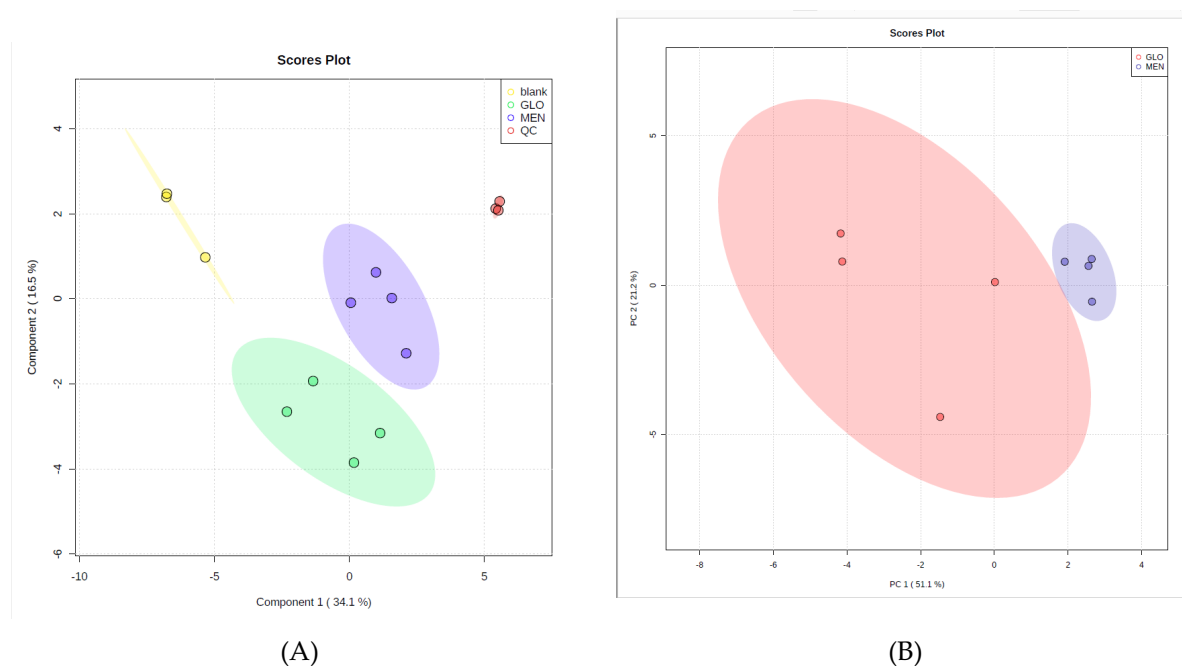

**Figure S1.** (A) Partial least squares data analysis (PLS-DA) of studied samples based on tentative lipids. Model passed permutation test with three components.  $R^2$  were 0.98 and  $Q^2$  at level 0.70; (B) Principal component analysis of meningiomas and gliomas based on tentative lipid with VIP-score above 1.0.

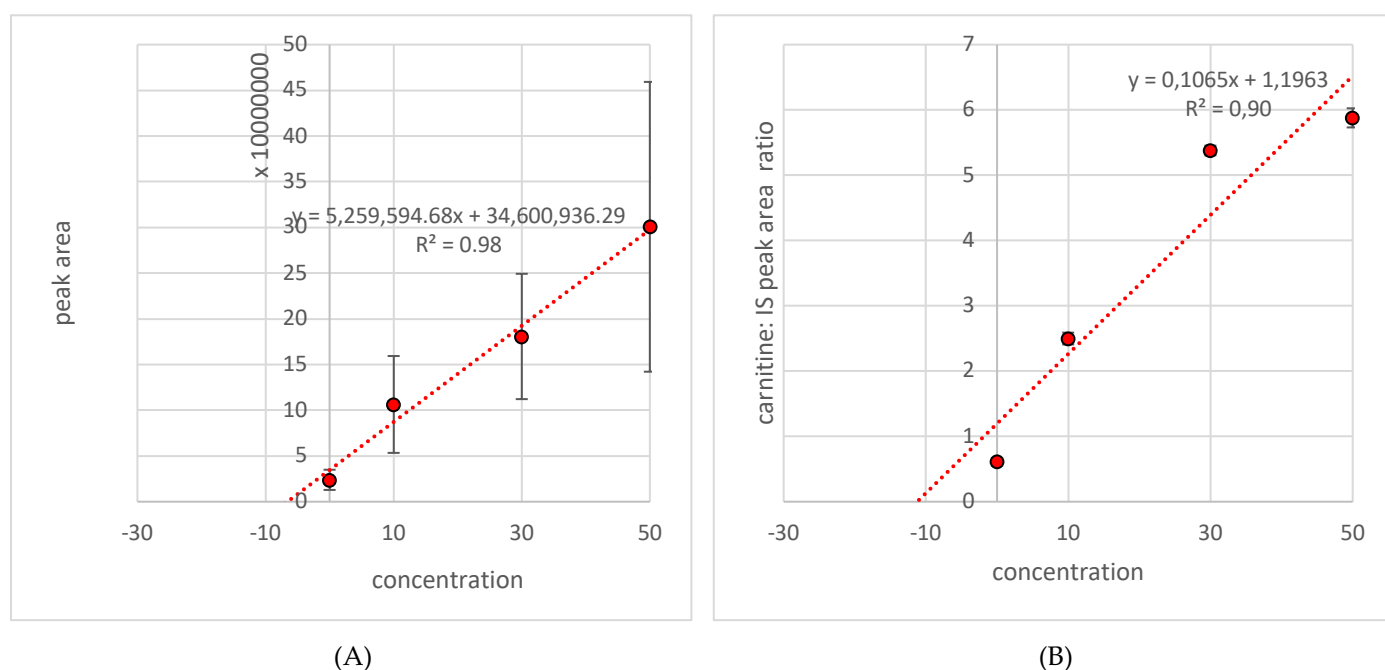

**Figure S2.** Standard addition curve of carnitine; (A) raw data; (B)- data normalized on internal standard (IS) area. Bars represent the standard deviation of peak areas and carnitine: IS peak area ratios.

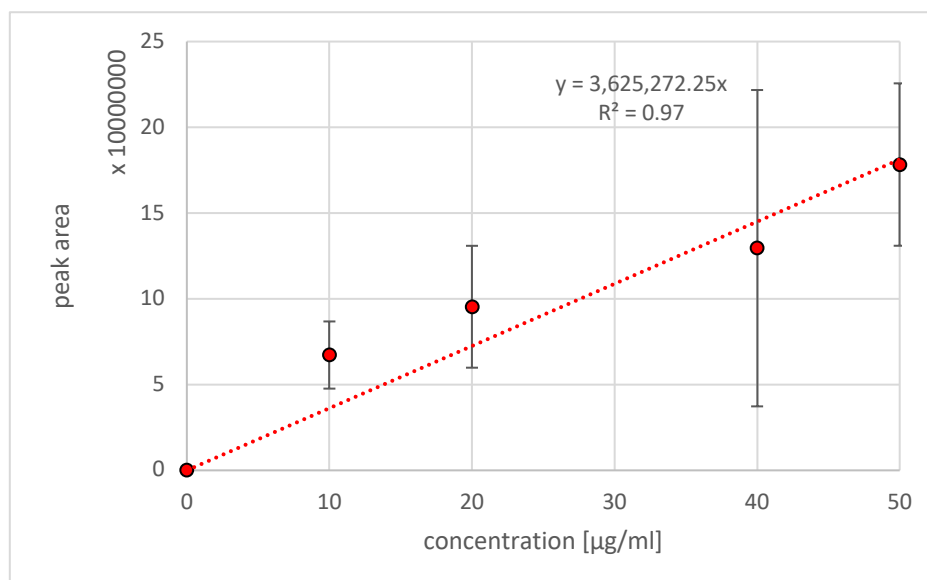

**Figure S3.** Calibration curve for carnitine(trimethyl-d9) in brain tumor homogenate. Bars represent the standard deviation of peak areas

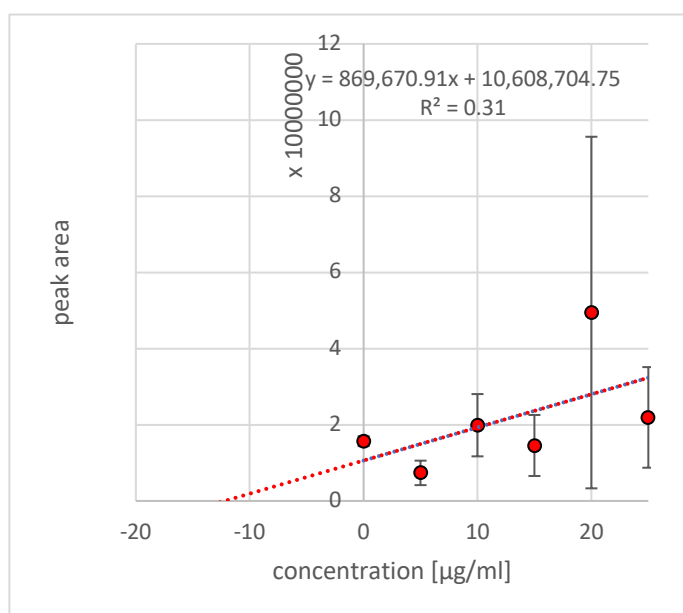

(A)

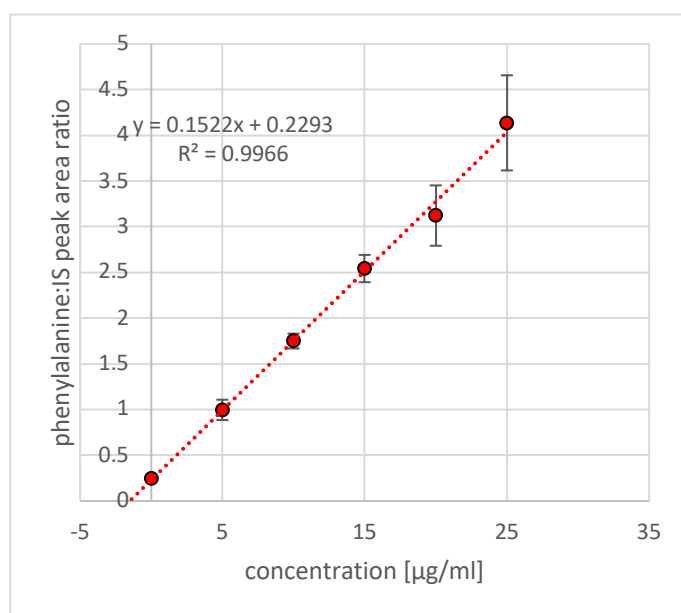

(B)

**Figure S4.** Standard addition curve of phenylalanine; (A) raw data; (B)- data normalized on internal standard (IS) area. Bars represent the standard deviation of peak areas and phenylalanine: IS peak area ratios.

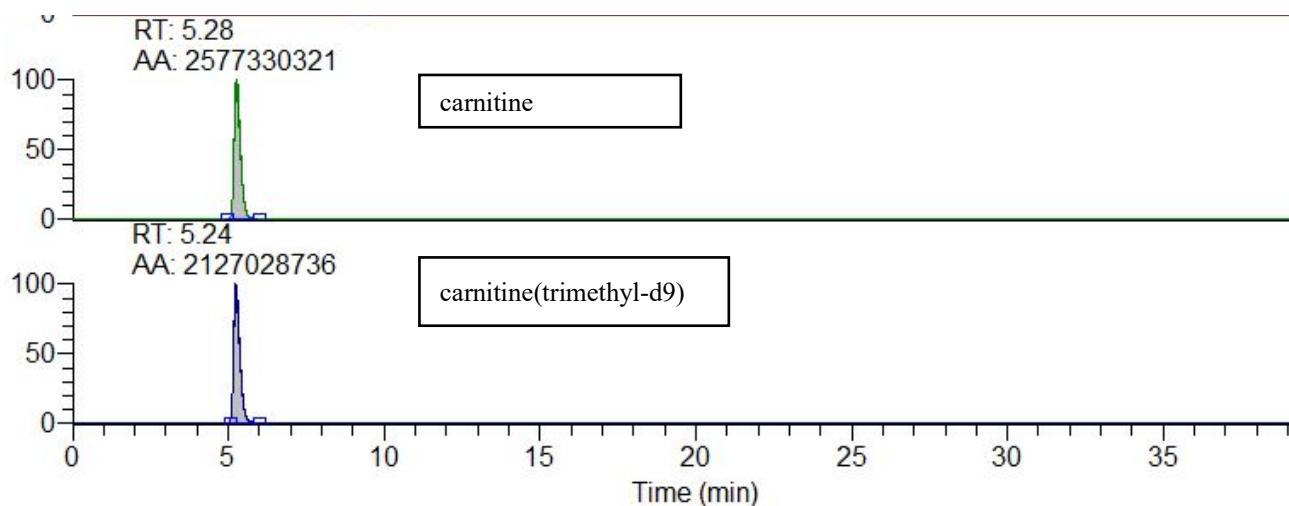

**Figure S5.** Comparison of the peak areas of the mixture of carnitine and its deuterated form in the concentration 10 ppm. The methodology of this analysis was presented in Bogusiewicz et al. (Bogusiewicz et al. 2020)\* under metabolomics analysis on PFP column.

\* Bogusiewicz, J.; Goryńska, P.Z.; Gaca, M.; Chmara, K.; Goryński, K.; Jaroch, K.; Paczkowski, D.; Furtak, J.; Harat, M.; Bojko, B. On-Site Sampling and Extraction of Brain Tumors for Metabolomics and Lipidomics Analysis. *J. Vis. Exp.* 2020, 2020, 159, doi:10.3791/61260.

**Table S1.** Peak areas and RSD for lipids used in the selection of desorption solvent for untargeted analysis.

| sample [x] +<br>phenylalanine | IPA:MeOH,1:3,v/v with 10 mM<br>ammonium acetate and 1 mM acetic acid |     | IPA:MeOH,1:1,v/v with 10 mM<br>ammonium acetate and 1 mM acetic acid |                  |
|-------------------------------|----------------------------------------------------------------------|-----|----------------------------------------------------------------------|------------------|
|                               | Average area                                                         | RSD | Average area                                                         | RSD <sup>1</sup> |
| PC C16-18:1                   | 811259                                                               | 23% | 766728                                                               | 51%              |
| LPE 17:1                      | 939323                                                               | 9%  | 1000845                                                              | 38%              |
| PG 17:0-20:4                  | 474606                                                               | 28% | 493471                                                               | 53%              |
| Sphingosine (d17:1)           | 2008763                                                              | 23% | 7106255                                                              | 110%             |

<sup>1</sup>relative standard deviation**Table S2.** Standard addition curve details for carnitine

| Sample [x] +<br>carnitine | Raw data  |     | Normalized data |                  |
|---------------------------|-----------|-----|-----------------|------------------|
|                           | area      | RSD | ratio           | RSD <sup>1</sup> |
| x+50 ug/ml                | 300725268 | 62% | 5.88            | 3%               |
| x+30 ug/ml                | 428917804 | 46% | 5.38            | 1%               |
| x+10 ug/ml                | 106366685 | 59% | 2.50            | 4%               |
| X                         | 23917467  | 39% | 0.61            | 10%              |

<sup>1</sup>relative standard deviation**Table S3.** Standard addition curve details for phenylalanine

| sample [x] +<br>phenylalanine | Raw data |     | Normalized data           |                  |
|-------------------------------|----------|-----|---------------------------|------------------|
|                               | area     | RSD | ratio:<br>standard/Deuter | RSD <sup>1</sup> |
| x+25 ug/ml                    | 21928862 | 60% | 4.14                      | 13%              |
| x+20 ug/ml                    | 49460652 | 93% | 3.12                      | 11%              |
| x+15 ug/ml                    | 14558740 | 55% | 2.54                      | 6%               |
| x+10 ug/ml                    | 19881108 | 41% | 1.75                      | 5%               |
| x+5 ug/ml                     | 7364715  | 44% | 1.00                      | 11%              |
| X                             | 3023055  | 43% | 0.24                      | 13%              |

<sup>1</sup>relative standard deviation
